# Supplementary material for: Relationships Between Diurnal Changes of Tongue Coating Microbiota and Intestinal Microbiota
Source: PubMed Central journal article supplement (PMC9008461; doi:10.3389/fcimb.2022.813790), 2022-03-31
Supplement: Presentation_1.pdf [file Presentation_1.pdf]

## Supplementary Material

### 1. Supplementary Figures and Tables

#### 1.1 Supplementary Figures

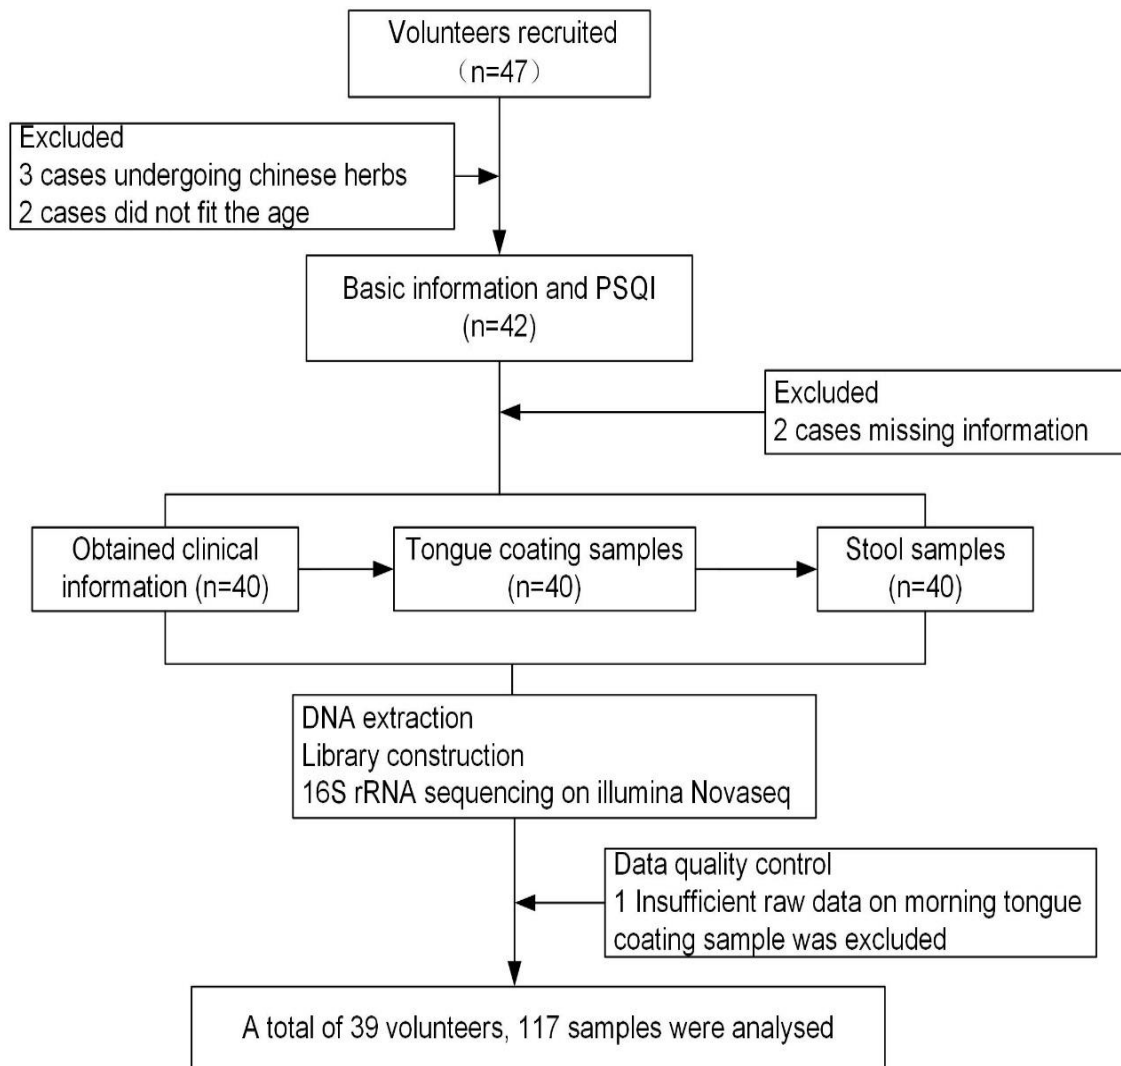

**Supplementary Figure 1. The research processes**

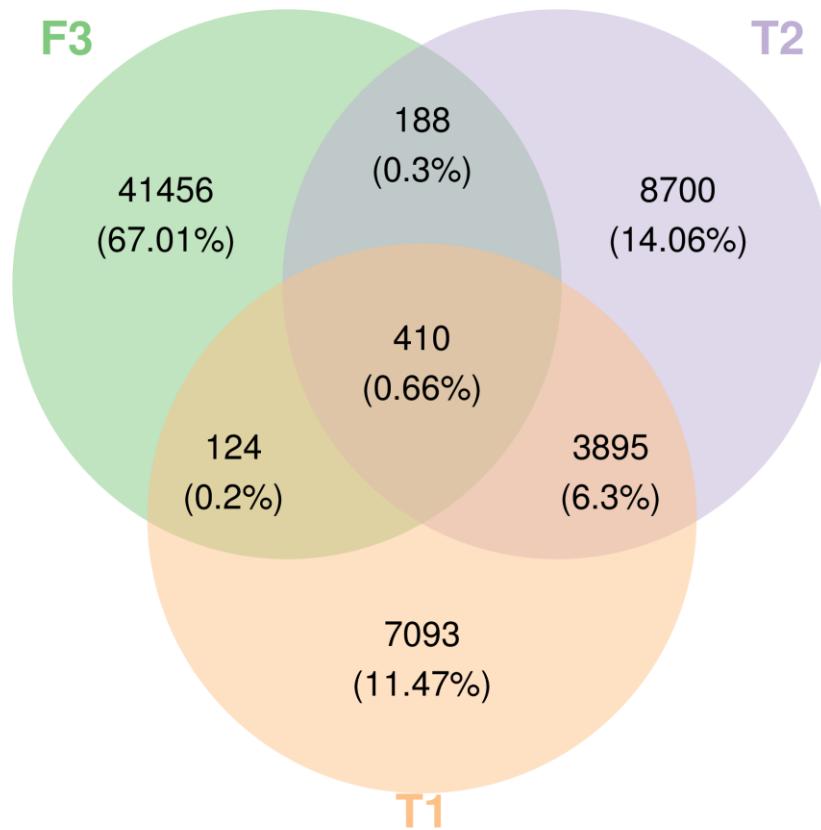

**Supplementary Figure 2. The Venn diagram of the ASV numbers of the tongue coating and intestinal microbiota** (the composition ratio in parentheses, T1 and T2 are the tongue coating microbiota before and after sleep respectively, F3 is the intestinal microbiota)

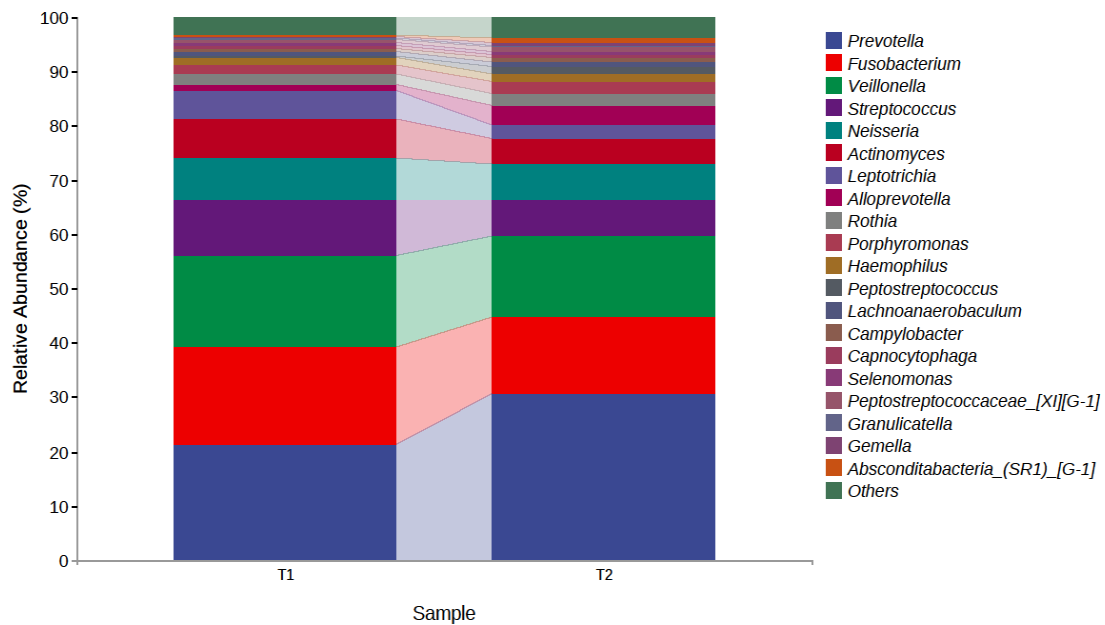

**Supplementary Figure 3. Compositions and relative abundance of the bacterial community in both groups at the genus level (top 20 genera, T1 and T2 are the tongue coating microbiota before and after sleep respectively).**

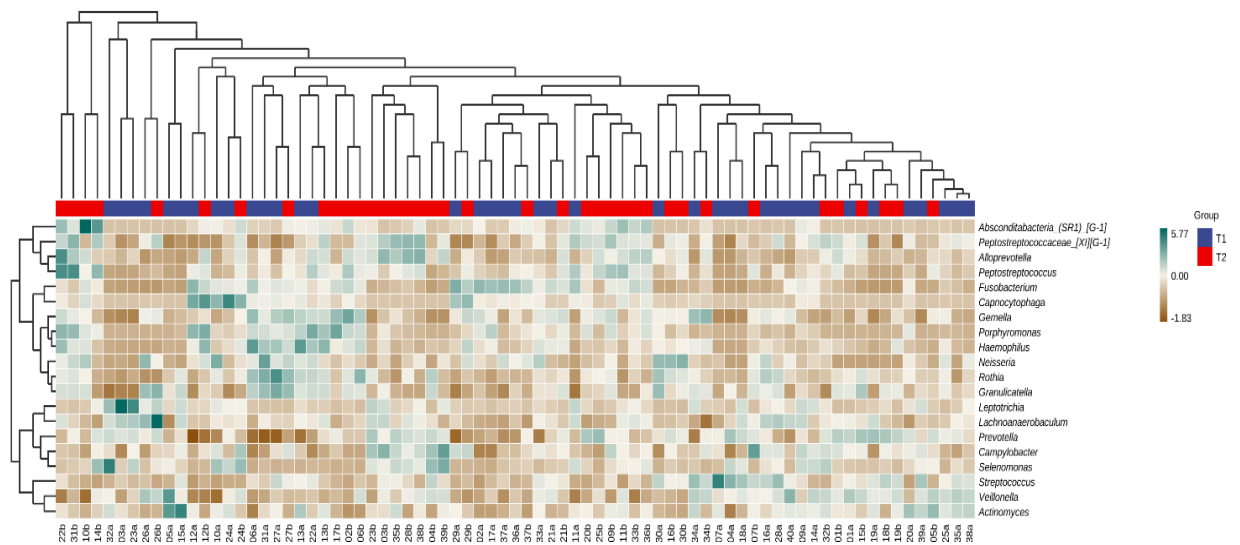

**Supplementary Figure 4. Compositions and relative abundance of the bacterial community in both groups at the genus level (top 20 genera).**

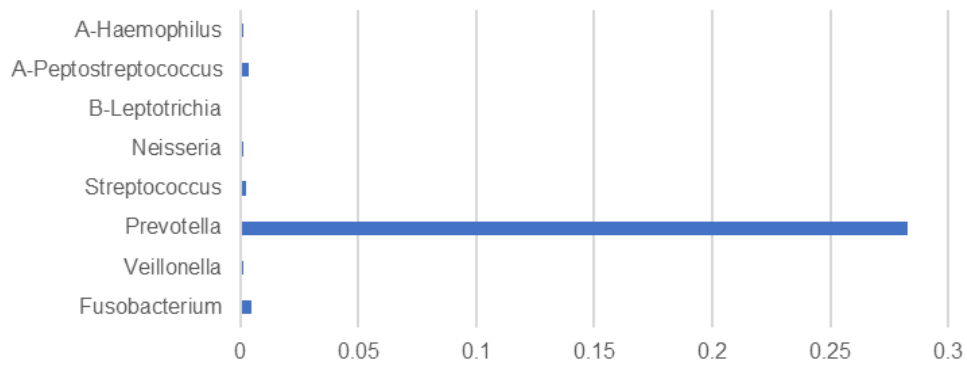

**Supplementary Figure 5. The porpotion of the typical oral microbiota in the intestine.**

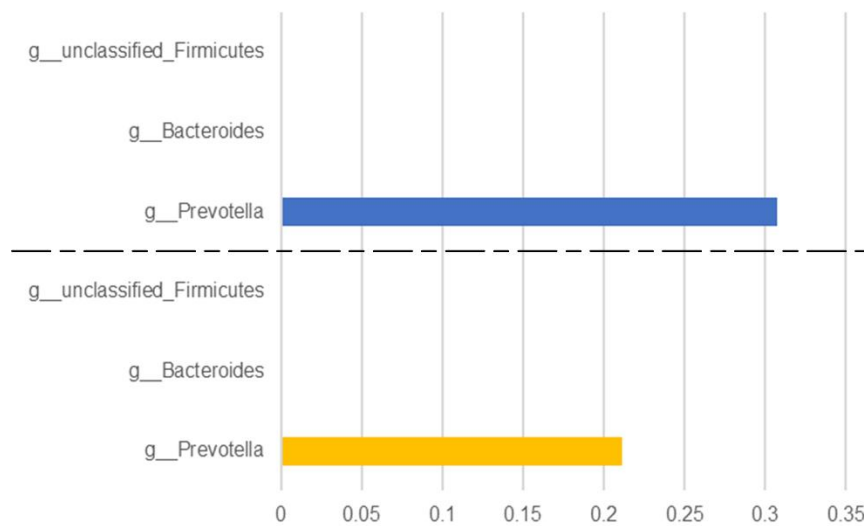

**Supplementary Figure 6. The porpotion of the typical intestinal microbiota in the tongue coating before and after sleep respectively (Corresponding to below and above the black dotted line respectively ).**

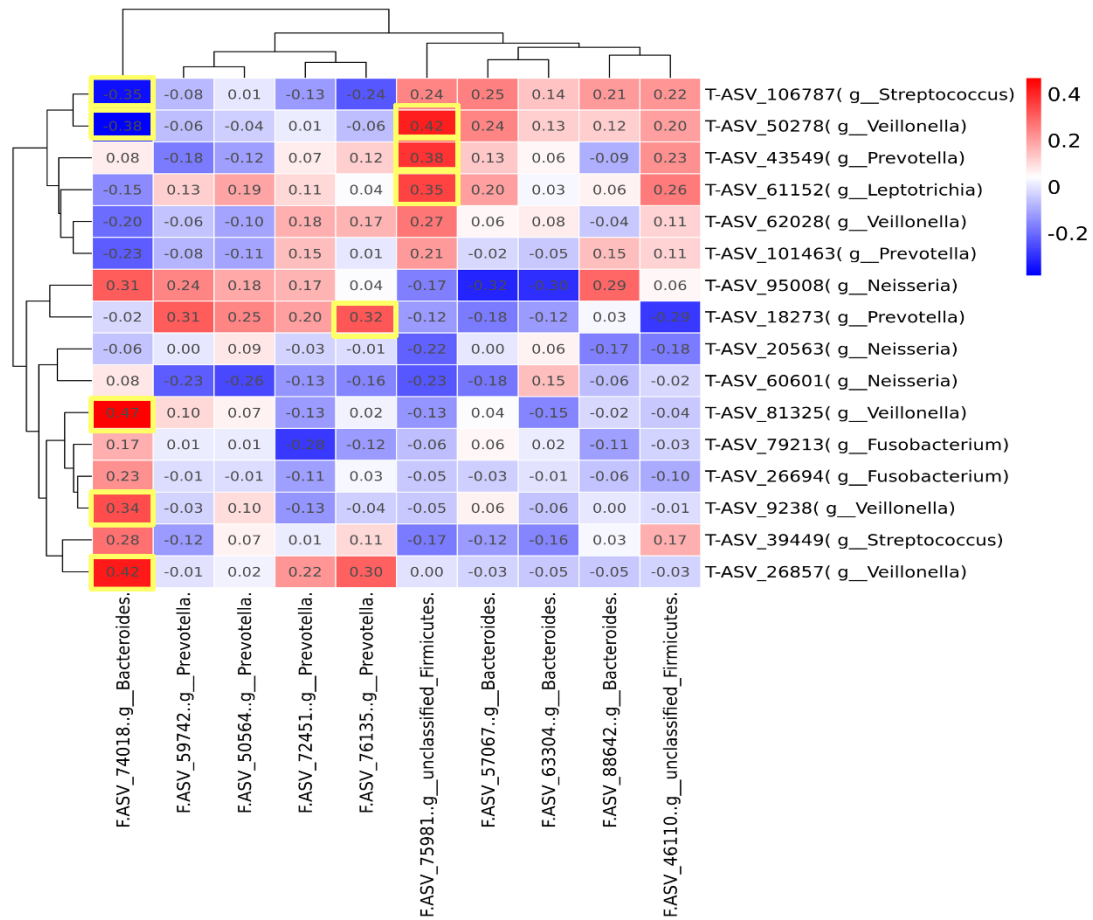

**Supplementary Figure 7. The correlation heat maps of typical tongue coating before sleep and typical intestinal microbiota.** (yellow box indicates that the correlation between the two is statistically significant,  $P < 0.05$ , vertical axis is the tongue coating microbiota, and the horizontal axis is the intestinal microbiota).

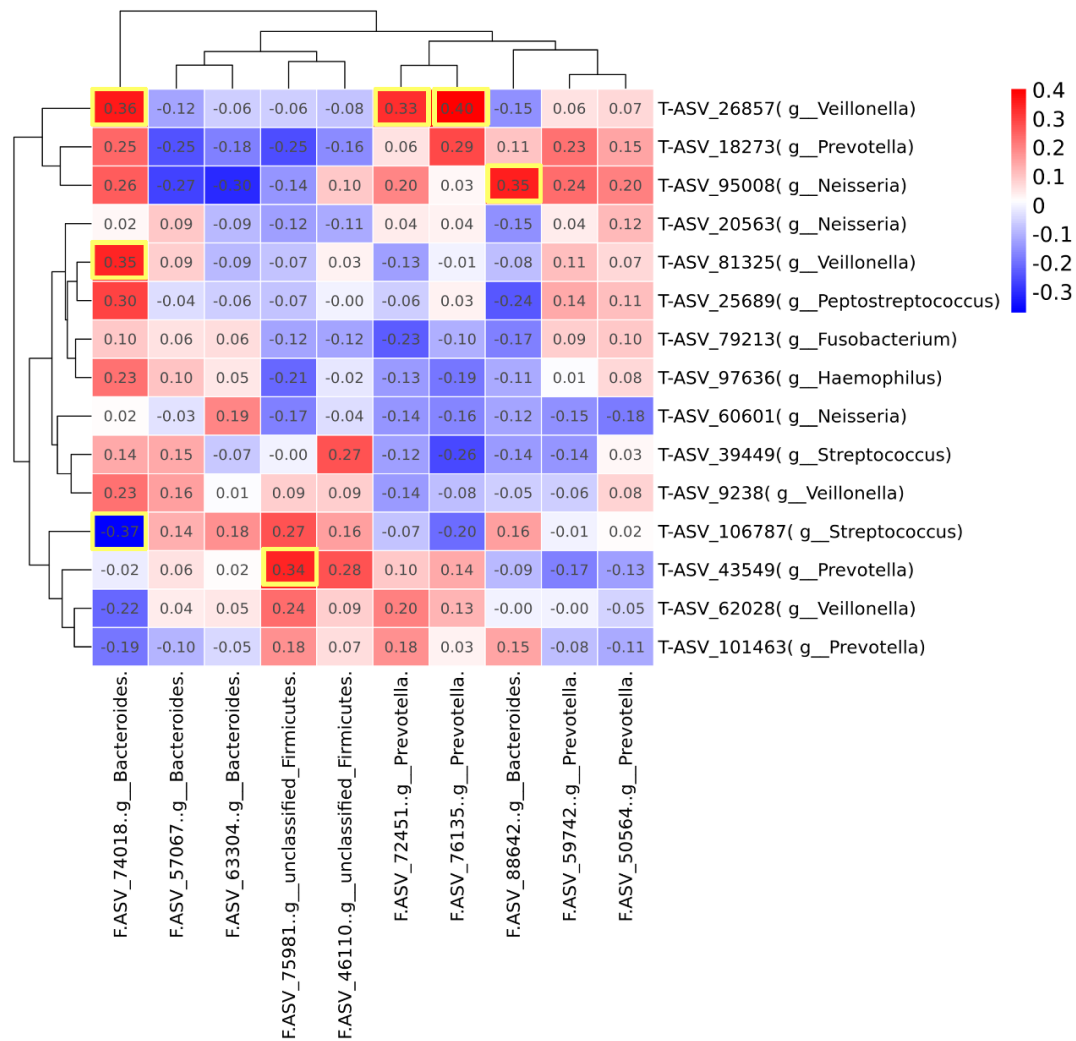

**Supplementary Figure 8. The correlation heat maps of typical tongue coating after sleep and typical intestinal microbiota respectively** (yellow box indicates that the correlation between the two is statistically significant,  $P < 0.05$ , vertical axis is the tongue coating microbiota, and the horizontal axis is the intestinal microbiota).

## 1.2 Supplementary tables

**Supplementary Table 1 Basic information of volunteers**

|                                                                                                     |                               |
|-----------------------------------------------------------------------------------------------------|-------------------------------|
| Demographics, clinical parameters, and habits                                                       | Participants                  |
| Sex                                                                                                 | 9males; 30females             |
| Age                                                                                                 | 21.35±2.66                    |
| BMI                                                                                                 | 20.63±4.54                    |
| Blood pressure:<br>Systolic blood pressure;<br>Diastolic blood pressure;                            | 108.77±11.46/72.25±8.00       |
| Dietary structure:<br>1.Mainly Carbohydrate;<br>2.Mainly meat and fatty foods;<br>3.A balanced diet | N1=25; N2=1; N3=13            |
| Taste hobby: 1.Sweet; 2.Spicy; 3.Normal.                                                            | N1=6; N2=14; N3=15;<br>N1+2=4 |
| Dentures/missing teeth                                                                              | N=0                           |
| Periodontal diagnosis                                                                               | N=0                           |
| Intraoral applications                                                                              | N=0                           |
| Daily medication use                                                                                | N=0                           |
| Recreational drug use                                                                               | N=0                           |
| History of chronic disease                                                                          | N=0                           |
| Antibiotic use in past 3 months                                                                     | N=0                           |
| Smokers                                                                                             | N=0                           |
| Drinkers                                                                                            | N=0                           |
| PSQI score                                                                                          | 4.31±2.20                     |

**Supplementary Table 2 Statistical table of analysis of differences in the distribution of tongue coating microbiota before and after sleep**

| Group1 | Group2 | Sample size | Permutations | Pseudo F | p value | q value |
|--------|--------|-------------|--------------|----------|---------|---------|
| all    | -      | 78          | 999          | 2.460838 | 0.001   | -       |
| T1     | T2     | 78          | 999          | 2.460838 | 0.001   | 0.001   |

**Supplementary Table 3 The difference of tongue coating microbiota before and after sleep (Top 10 genus)**

| Group | Prevotella  | Fusobacterium | Veillonella | Streptococcus | Neisseria   | Actinomyces | Leptotrichia | Alloprevotella | Rothia      | Porphyromonas |
|-------|-------------|---------------|-------------|---------------|-------------|-------------|--------------|----------------|-------------|---------------|
| T1    | 0.212±0.125 | 0.179±0.191   | 0.169±0.092 | 0.103±0.088   | 0.077±0.085 | 0.071±0.05  | 0.053±0.078  | 0.011±0.009    | 0.021±0.022 | 0.015±0.022   |
| T2    | 0.307±0.115 | 0.145±0.121   | 0.15±0.07   | 0.066±0.045   | 0.064±0.066 | 0.048±0.027 | 0.023±0.029  | 0.036±0.023    | 0.021±0.016 | 0.022±0.027   |
| Z     | -4.535      | -1.102        | -1.703      | -3.879        | -0.949      | -3.628      | -3.935       | -5.442         | -0.326      | -3.824        |
| P     | 0.000       | 0.270         | 0.089       | 0.000         | 0.343       | 0.000       | 0.000        | 0.000          | 0.744       | 0.000         |

**Supplementary Table 3 The difference of tongue coating microbiota before and after sleep (Top 11-19 genus)**

| Group | Haemophilus | Peptostreptococcus | Lachnoanaerobaculum | Capnocytophaga | Campylobacter | Peptostreptococcaceae_[XI][G-1] | Selenomonas | Granulicatella | Gemella     |
|-------|-------------|--------------------|---------------------|----------------|---------------|---------------------------------|-------------|----------------|-------------|
| T1    | 0.014±0.019 | 0.005±0.005        | 0.008±0.004         | 0.007±0.012    | 0.005±0.003   | 0.004±0.003                     | 0.005±0.008 | 0.004±0.003    | 0.004±0.003 |
| T2    | 0.015±0.015 | 0.013±0.011        | 0.007±0.005         | 0.006±0.011    | 0.008±0.005   | 0.008±0.004                     | 0.006±0.007 | 0.005±0.003    | 0.005±0.003 |
| Z     | -1.689      | -5.428             | -1.716              | -0.355         | -3.586        | -4.982                          | -0.963      | -1.423         | -3.684      |
| P     | 0.091       | 0.000              | 0.086               | 0.723          | 0.000         | 0.000                           | 0.336       | 0.155          | 0.000       |

**Supplementary Table 4 The difference of typical tongue coating microbiota before and after sleep (genus level)**

| Group | Alloprevotella | Peptostreptococcus | Peptostreptococcaceae_[XI][G-1] | Proteus       | Bacteroides   | Actinomyces | Streptococcus | Leptotrichia | Campylobacter | Lachnoanaerobaculum |
|-------|----------------|--------------------|---------------------------------|---------------|---------------|-------------|---------------|--------------|---------------|---------------------|
| T1    | 0.011±0.009    | 0.005±0.005        | 0.004±0.003                     | 0.0002±0.0001 | 0.0004±0.0002 | 0.072±0.050 | 0.103±0.088   | 0.053±0.079  | 0.004±0.003   | 0.008±0.004         |
| T2    | 0.036±0.023    | 0.013±0.011        | 0.008±0.004                     | 0.0002±0.0001 | 0.0007±0.0004 | 0.048±0.027 | 0.066±0.045   | 0.023±0.029  | 0.008±0.005   | 0.007±0.005         |
| Z     | -5.442         | -5.428             | -4.982                          | -2.665        | -3.642        | -3.628      | -3.879        | -3.935       | -3.586        | -1.716              |
| P     | 0.000          | 0.000              | 0.000                           | 0.008         | 0.000         | 0.000       | 0.000         | 0.000        | 0.000         | 0.086               |
